# Supplementary material
Source: publisher site journal article supplement (https://www.dovepress.com/get_supplementary_file.php?f=462181.docx)
Supplement: Supplementary file 1 [file get_supplementary_file.php]

Supplementary Table 1: Collinearity diagnostics steps of LCI with other covariates.

|  | VIF | | | | |
| --- | --- | --- | --- | --- | --- |
|  | Step 1 | Step 2 | Step 3 | Step 4 | Step 5 | |
| LCI | 6.8 | 6.8 | 6.8 | 6.8 | 2 | |
| Age | 1.3 | 1.3 | 1.3 | 1.3 | 1.3 | |
| Sex | 3.3 | 3.3 | 3.3 | 3.3 | 3.2 | |
| Height | 51.7 | 51.7 | 2.4 | 2.4 | 2.4 | |
| Weight | 168.7 | 168.7 | NA | NA | NA | |
| BMI | 93.3 | 93.3 | 1.7 | 1.7 | 1.7 | |
| ALT | 4.1 | 4.1 | 4.1 | 4.1 | 4.1 | |
| AST | 3.3 | 3.3 | 3.3 | 3.3 | 3.3 | |
| GGT | 1.5 | 1.5 | 1.5 | 1.5 | 1.4 | |
| TC | Inf | NA | NA | NA | NA | |
| TG | Inf | 5.4 | 5.4 | 5.4 | NA | |
| LDL-C | Inf | 1.9 | 1.9 | 1.9 | 1.7 | |
| HDL-C | Inf | 1.6 | 1.6 | 1.6 | 1.6 | |
| HbA1c | 1.2 | 1.2 | 1.2 | 1.2 | 1.2 | |
| FPG | 1.5 | 1.5 | 1.5 | 1.5 | 1.5 | |
| SBP | 5.5 | 5.5 | 5.5 | 1.4 | 1.4 | |
| DBP | 5.6 | 5.6 | 5.6 | NA | NA | |
| Exercise habits | 1 | 1 | 1 | 1 | 1 | |
| Drinking status | 1.2 | 1.2 | 1.2 | 1.2 | 1.2 | |
| Smoking status | 1.4 | 1.4 | 1.4 | 1.4 | 1.4 | |

Abbreviations: Inf: infinity; VIF: variance inflation factor; LCI: lipoprotein combine index; BMI: body mass index; ALT: alanine aminotransferase; AST: aspartate aminotransferase; GGT: gamma-glutamyl transferase; HDL-C: high-density lipoprotein cholesterol; TC: total cholesterol; LDL-C: Low density lipoprotein cholesterol; TG: triglyceride; HbA1c: hemoglobin A1c; FPG: fasting plasma glucose; SBP: systolic blood pressure; DBP: diastolic blood pressure.

Note 1: VIF = 1/(1-R2).

Note-2: The variables with VIF >5 will be regarded as collinear variables and cannot be included in the multiple regression model.

Supplementary Table 2: Collinearity diagnostics steps of TC with other covariates.

|  | VIF | | | | |
| --- | --- | --- | --- | --- | --- |
|  | Step 1 | Step 2 | Step 3 | Step 4 | Step 5 | |
| TC | Inf | 46 | 45.9 | 1.3 | 1.3 | |
| Age | 1.3 | 1.3 | 1.3 | 1.3 | 1.3 | |
| Sex | 3.3 | 3.3 | 3.3 | 3.3 | 3.2 | |
| Height | 51.6 | 51.6 | 2.4 | 2.4 | 2.4 | |
| Weight | 168.5 | 168.5 | NA | NA | NA | |
| BMI | 93.2 | 93.2 | 1.7 | 1.7 | 1.7 | |
| ALT | 4.1 | 4.1 | 4.1 | 4.1 | 4.1 | |
| AST | 3.3 | 3.3 | 3.3 | 3.3 | 3.3 | |
| GGT | 1.5 | 1.5 | 1.5 | 1.4 | 1.4 | |
| TG | Inf | NA | NA | NA | NA | |
| LDL-C | Inf | 46.6 | 46.4 | NA | NA | |
| HDL-C | Inf | 9.1 | 9.1 | 1.5 | 1.5 | |
| HbA1c | 1.2 | 1.2 | 1.2 | 1.2 | 1.2 | |
| FPG | 1.5 | 1.5 | 1.5 | 1.5 | 1.5 | |
| SBP | 5.5 | 5.5 | 5.5 | 5.5 | 1.4 | |
| DBP | 5.6 | 5.6 | 5.6 | 5.6 | NA | |
| Exercise habits | 1 | 1 | 1 | 1 | 1 | |
| Drinking status | 1.2 | 1.2 | 1.2 | 1.2 | 1.2 | |
| Smoking status | 1.4 | 1.4 | 1.4 | 1.4 | 1.4 | |

Abbreviations: Inf: infinity; VIF: variance inflation factor; BMI: body mass index; ALT: alanine aminotransferase; AST: aspartate aminotransferase; GGT: gamma-glutamyl transferase; HDL-C: high-density lipoprotein cholesterol; TC: total cholesterol; LDL-C: Low density lipoprotein cholesterol; TG: triglyceride; HbA1c: hemoglobin A1c; FPG: fasting plasma glucose; SBP: systolic blood pressure; DBP: diastolic blood pressure.

Note 1: VIF = 1/(1-R2).

Note-2: The variables with VIF >5 will be regarded as collinear variables and cannot be included in the multiple regression model.

Supplementary Table 3: Collinearity diagnostics steps of TG with other covariates.

|  | VIF | | | |
| --- | --- | --- | --- | --- |
|  | Step 1 | Step 2 | Step 3 | Step 4 | |
| TG | Inf | 1.6 | 1.6 | 1.6 | |
| Age | 1.3 | 1.3 | 1.3 | 1.3 | |
| Sex | 3.3 | 3.3 | 3.3 | 3.2 | |
| Height | 51.6 | 51.6 | 2.4 | 2.4 | |
| Weight | 168.5 | 168.5 | NA | NA | |
| BMI | 93.2 | 93.2 | 1.7 | 1.7 | |
| ALT | 4.1 | 4.1 | 4.1 | 4.1 | |
| AST | 3.3 | 3.3 | 3.3 | 3.3 | |
| GGT | 1.5 | 1.5 | 1.5 | 1.5 | |
| TC | Inf | NA | NA | NA | |
| LDL-C | Inf | 1.3 | 1.3 | 1.3 | |
| HDL-C | Inf | 1.6 | 1.6 | 1.6 | |
| HbA1c | 1.2 | 1.2 | 1.2 | 1.2 | |
| FPG | 1.5 | 1.5 | 1.5 | 1.5 | |
| SBP | 5.5 | 5.5 | 5.5 | 1.4 | |
| DBP | 5.6 | 5.6 | 5.6 | NA | |
| Exercise habits | 1 | 1 | 1 | 1 | |
| Drinking status | 1.2 | 1.2 | 1.2 | 1.2 | |
| Smoking status | 1.4 | 1.4 | 1.4 | 1.4 | |

Abbreviations: Inf: infinity; VIF: variance inflation factor; BMI: body mass index; ALT: alanine aminotransferase; AST: aspartate aminotransferase; GGT: gamma-glutamyl transferase; HDL-C: high-density lipoprotein cholesterol; TC: total cholesterol; LDL-C: Low density lipoprotein cholesterol; TG: triglyceride; HbA1c: hemoglobin A1c; FPG: fasting plasma glucose; SBP: systolic blood pressure; DBP: diastolic blood pressure.

Note 1: VIF = 1/(1-R2).

Note-2: The variables with VIF >5 will be regarded as collinear variables and cannot be included in the multiple regression model.

Supplementary Table 4: Collinearity diagnostics steps of LDL-C with other covariates.

|  | VIF | | | |
| --- | --- | --- | --- | --- |
|  | Step 1 | Step 2 | Step 3 | Step 4 | |
| LDL-C | Inf | 1.3 | 1.3 | 1.3 | |
| Age | 1.3 | 1.3 | 1.3 | 1.3 | |
| Sex | 3.3 | 3.3 | 3.3 | 3.2 | |
| Height | 51.6 | 51.6 | 2.4 | 2.4 | |
| Weight | 168.5 | 168.5 | NA | NA | |
| BMI | 93.2 | 93.2 | 1.7 | 1.7 | |
| ALT | 4.1 | 4.1 | 4.1 | 4.1 | |
| AST | 3.3 | 3.3 | 3.3 | 3.3 | |
| GGT | 1.5 | 1.5 | 1.5 | 1.5 | |
| TC | Inf | NA | NA | NA | |
| TG | Inf | 1.6 | 1.6 | 1.6 | |
| HDL-C | Inf | 1.6 | 1.6 | 1.6 | |
| HbA1c | 1.2 | 1.2 | 1.2 | 1.2 | |
| FPG | 1.5 | 1.5 | 1.5 | 1.5 | |
| SBP | 5.5 | 5.5 | 5.5 | 1.4 | |
| DBP | 5.6 | 5.6 | 5.6 | NA | |
| Exercise habits | 1 | 1 | 1 | 1 | |
| Drinking status | 1.2 | 1.2 | 1.2 | 1.2 | |
| Smoking status | 1.4 | 1.4 | 1.4 | 1.4 | |

Abbreviations: Inf: infinity; VIF: variance inflation factor; BMI: body mass index; ALT: alanine aminotransferase; AST: aspartate aminotransferase; GGT: gamma-glutamyl transferase; HDL-C: high-density lipoprotein cholesterol; TC: total cholesterol; LDL-C: Low density lipoprotein cholesterol; TG: triglyceride; HbA1c: hemoglobin A1c; FPG: fasting plasma glucose; SBP: systolic blood pressure; DBP: diastolic blood pressure.

Note 1: VIF = 1/(1-R2).

Note-2: The variables with VIF >5 will be regarded as collinear variables and cannot be included in the multiple regression model.

Supplementary Table 5: Collinearity diagnostics steps of HDL-C with other covariates.

|  | VIF | | | |
| --- | --- | --- | --- | --- |
|  | Step 1 | Step 2 | Step 3 | Step 4 | |
| HDL-C | Inf | 1.6 | 1.6 | 1.6 | |
| Age | 1.3 | 1.3 | 1.3 | 1.3 | |
| Sex | 3.3 | 3.3 | 3.3 | 3.2 | |
| Height | 51.6 | 51.6 | 2.4 | 2.4 | |
| Weight | 168.5 | 168.5 | NA | NA | |
| BMI | 93.2 | 93.2 | 1.7 | 1.7 | |
| ALT | 4.1 | 4.1 | 4.1 | 4.1 | |
| AST | 3.3 | 3.3 | 3.3 | 3.3 | |
| GGT | 1.5 | 1.5 | 1.5 | 1.5 | |
| TC | Inf | NA | NA | NA | |
| TG | Inf | 1.6 | 1.6 | 1.6 | |
| LDL-C | Inf | 1.3 | 1.3 | 1.3 | |
| HbA1c | 1.2 | 1.2 | 1.2 | 1.2 | |
| FPG | 1.5 | 1.5 | 1.5 | 1.5 | |
| SBP | 5.5 | 5.5 | 5.5 | 1.4 | |
| DBP | 5.6 | 5.6 | 5.6 | NA | |
| Exercise habits | 1 | 1 | 1 | 1 | |
| Drinking status | 1.2 | 1.2 | 1.2 | 1.2 | |
| Smoking status | 1.4 | 1.4 | 1.4 | 1.4 | |

Abbreviations: Inf: infinity; VIF: variance inflation factor; BMI: body mass index; ALT: alanine aminotransferase; AST: aspartate aminotransferase; GGT: gamma-glutamyl transferase; HDL-C: high-density lipoprotein cholesterol; TC: total cholesterol; LDL-C: Low density lipoprotein cholesterol; TG: triglyceride; HbA1c: hemoglobin A1c; FPG: fasting plasma glucose; SBP: systolic blood pressure; DBP: diastolic blood pressure.

Note 1: VIF = 1/(1-R2).

Note-2: The variables with VIF >5 will be regarded as collinear variables and cannot be included in the multiple regression model.
